# Supplementary material
Source: Research Square preprint supplement (doi:10.21203/rs.3.rs-9138493/v1)
Supplement: Supplementary file 1 [file b0418f4495d1614783029dfe.pdf]

**Supplementary Information for  
Bonds Improve Post Mission Disposal Compliance and the Sustainability of Low Earth Orbit**

## SI1: MOCAT-SSEM Description

The model focuses on aggregate trends rather than individual object specifics. LEO is split into altitude *shells* and *species*. In this context, species refers to classes of objects, split by characteristics such as mass, radius or their object type. Examples of species could include satellites, debris or rocket bodies. Figure S1 presents the relationship between species and orbital shells, with a simplified set of species. For each orbital region, defined by an altitude range and divided into  $n_h$  orbital shells, each with a thickness of  $d$ , these objects can be classified into either *sources* or *sinks*

$$\dot{P}_h = \dot{\Lambda}_h + \dot{C}_h^{PMD} + \dot{F}_h + \dot{C}_h \quad (S1)$$

for  $h_i \in \{1, 2, \dots, n_h\}$ , where the change in the population of each  $P$  species,  $\dot{P}$ , is a function of launch rate,  $\dot{\Lambda}$ , post-mission disposal,  $\dot{C}^{PMD}$ , atmospheric drag,  $\dot{F}$ , and collisions,  $\dot{C}$  [8].

For each active satellite species  $P$ , it is typical to simulate a fraction of satellites being de-orbited from each altitude bin at each time step, based on their assumed operational lifetime,  $\Delta t$ , to account for deliberate post-mission disposal. For the corresponding debris category associated with each active satellite type, a percentage of post-mission disposal failures is modelled to occur at each time step, reflecting the likelihood that some satellites will fail to execute their planned de-orbit procedures.

$$\dot{C}^{PMD} = \frac{1 - P_M}{\Delta t} P \quad (S2)$$

with a probability of success equal to  $P_M$ .

Objects are binned by semi-major axis ( $a$ ) and eccentricity ( $e$ ), with the representative time in shell calculated as a function of their orbit to provide an effective altitude population (fractional orbits). Objects are only affected by atmospheric drag, other perturbations in LEO are ignored due to their smaller impacts on accelerations and position. The number of  $a$  and  $e$  bins is configurable.

### Collisions

A fundamental element of any debris model is calculating the probability of collision and the consequent number of fragments. In the SSEM framework, each species is uniquely paired with others, representing the set of potential collisions pairs in the simulation. The collision rate for species  $i$  denoted as  $\dot{C}_i$  is given by:

$$\dot{C}_i = \sum_{k=1}^{N_c} \Gamma_{ij} \phi_{ij} P_i P_j + \dot{C}_{i,add} \quad (S3)$$

This equation indicates that in each shell and for each collision species pair, the primary and secondary collision species lose objects to collisions at a rate based on the behaviours of the two species  $\Gamma_{ij}$  and the physical geometry of the objects and shells  $\phi_{ij}$ . For debris species, the population is potentially also increased by the output of collisions between other species pairs,  $\dot{C}_{i,add}$ .

$\Gamma_{ij}$  is a matrix that quantifies the likelihood of a collision between species  $P_i$  and  $P_j$ , generally beginning with a value of -1, to reflect that the species in that shell is decremented by one during a collision, and additional terms that modify collision probability to reflect factors like orbit coordination for mutual physical separation and collision avoidance manoeuvre efficacy. For example, in the case of two manoeuvrable slotted satellites species  $\Gamma_{ij}$  may be set to zero under the assumption that two satellites within the same constellation will not collide.

$$\phi_{ij} = \pi \frac{v_r(h) \sigma_{ij}}{V(h)} \quad (S4)$$

Equation S4 represents the physical aspects of collision probability subject to a kinetic theory of gases assumption.  $V(h)$  and  $v_r(h)$  are the volume of the altitude shell and the average velocity of the shell.  $\sigma_{ij}$  is a function of radius of the colliding objects,  $r_i$  and  $r_j$ :

$$\sigma_{ij} = (r_i + r_j)^2 \quad (S5)$$

Finally,  $\dot{C}_{i,add}$  represents the additional fragments generated from a collision ( $n_f$ ) based on its impact velocity. For each collision, if the impact velocity is above 40 J/g then it is considered to be catastrophic. The number of fragments are calculated from the NASA Standard Break Up Model [5] and then are binned back to each species by their mass.

The number of manoeuvres are challenging to estimate in a SSEM due to the lack of an orbit trajectory and the theory of gas assumption. Therefore, the model applies a baseline assumption that manoeuvrable satellites experiences the same number of potential collision events as other species before scaled by  $\Gamma_{i,j}$ . This corresponds to an approximate one-to-one ratio between true collisions and avoidance manoeuvres. The frequency of such manoeuvres can also be scaled: for example, applying a factor of two implies that, on average, a manoeuvrable satellite performs two avoidance manoeuvres for every one true collision.

## Species

The debris model is configurable to any number of species and orbital shells. For this paper, we following the classification proposed by [6], we include three satellite types: constellation satellites ( $S$ ), non-constellation satellites ( $S_u$ ), and satellites below 20 kg (including CubeSats) ( $S_{ns}$ ). The debris population has been split into debris and rocket bodies. Only debris greater than 10 cm is modelled, there are 3 active, 6 debris species and 1 rocket body species. Table ?? summarises the complete configuration of all species used in the MOCAT-SSEM debris environment model and the OPUS economic module. These parameters define the physical characteristics (mass, radius, drag coefficient), operational behaviour (manoeuvrability, PMD success rates, slotted status), and the economic attributes used in the IAM (revenue intercepts, delta-v costs, disposal preferences).

## Elliptical Orbits

MOCAT-SSEM uses a flux model that uses the Brouwer-Lyddane theory [9, 4] to average perturbations to obtain the variational equations for the orbital elements with the combined effect of drag and oblateness. The propagator assumes that the density is constant at each time step and the orbit eccentricity is small. To reduce the computational effort, only the effect of atmospheric drag is modelled to derive the rate of change for the semi-major axis  $a$  and eccentricity  $e$ . These are then used in the updated SSEM equations to provide the time-dependent transition of objects from particular  $a/e$  bin to other  $a/e$  bins.

Let us define:

$$\beta_0 = \frac{\sqrt{3}}{2} \bar{e}_0, \quad \bar{n}_0 = \sqrt{\frac{\mu}{\bar{a}_0^3}}, \quad C_0 = \frac{1}{2} C_D \frac{A}{m} \rho_0; \quad (S6)$$

the resulting set of equations used for the propagation is

$$\begin{aligned} \frac{d\bar{a}}{dt} &= - \left( \frac{2\bar{a}_0^2 \bar{n}_0 C_0}{\beta_0 \bar{e}_0} \right) \tan(\text{atan}(\beta_0) - \beta_0 \bar{n}_0 \bar{a}_0 C_0 (t - t_0)) \sec^2(\text{atan}(\beta_0) - \beta_0 \bar{n}_0 \bar{a}_0 C_0 (t - t_0)) \\ \frac{d\bar{e}}{dt} &= -\bar{e}_0 \bar{n}_0 \bar{a}_0 C_0 \left( \frac{1}{\cos(\text{atan}(\beta_0) - \beta_0 \bar{n}_0 \bar{a}_0 C_0 (t - t_0))} \right)^2 \end{aligned} \quad (S7)$$

where  $\bar{a}, \bar{e}$  represents the averaged semi-major axis and eccentricity of the space object at time  $t$ . The subscript 0 denotes the state variables at the initial time of propagation  $t_0$ ,  $\mu$  the gravitational parameter,  $\rho$  the atmospheric density, and  $C_D, A$ , and  $m$  representing the drag coefficient, area, and mass, respectively. The atmospheric density is calculated from JB2008 [1] with a solar cycle added [4], LEO atmospheric density over time is shown in Figure S4.

The second key change is the movement of objects across bins by assessing the rate of change of objects into bins through a flux. First, the model defines a set number of bins for  $a$  and  $e$ . Figure S2 presents a visual description of the method. Grid cells or boxes are defined in both  $a$  and  $e$ . After the grid cells are derived, the rate of change of the objects flowing into each cell is required,  $\dot{a}$  and  $\dot{e}$ . The next step is to use those to find the flux across each boundary. As the box walls are orthogonal in  $a$  and  $e$ , the flux will functionally going in  $a$  and  $e$  directions. The model forces that these orbital elements will only decrease.

The density of objects in each cell  $N(a, s, e)$  is initialised from a given population distribution. Each grid cell of size  $\Delta a \times \Delta e$  in semi-major axis and eccentricity space, is indexed by the pair  $(a, e)$ , where  $a$  and  $e$  denote the bin-centred values of the semi-major axis and eccentricity, respectively. The total number of objects in each cell is given by  $N(a, s, e)$  for species  $P$  at time  $t$ . The time evolution of  $N(a, s, e)$  is governed by the net flux of objects across cell boundaries, which is computed from the analytical orbit propagator that provides the change of  $\dot{a}(a, e)$  and  $\dot{e}(a, e)$  due to atmospheric drag. Using a finite-volume approach, the change of object in a cell  $(a, e)$  is given by:

$$F(a, P, e) = \Phi_{\text{in}}^a(a, P, e) - \Phi_{\text{out}}^a(a, P, e) + \Phi_{\text{in}}^e(a, P, e) - \Phi_{\text{out}}^e(a, P, e) \quad (\text{S8})$$

where  $\Phi_{\text{in}}^a$  and  $\Phi_{\text{in}}^e$  represent the flux entering from adjacent higher  $a$  and  $e$  bins, while  $\Phi_{\text{out}}^a$  and  $\Phi_{\text{out}}^e$  are the fluxes leaving the current cell. The outgoing fluxes are computed as:

$$\Phi_{\text{out}}^a(a, P, e) = \frac{N(a, P, e) \cdot \dot{a}(a, e)}{\Delta a} \quad (\text{S9})$$

$$\Phi_{\text{out}}^e(a, P, e) = \frac{N(a, P, e) \cdot \dot{e}(a, e)}{\Delta e} \quad (\text{S10})$$

These represent the number of objects leaving the cell per unit time due to change in  $a$  and  $e$ , normalized by the size of the bin in each dimension. Since the total population in a cell cannot become negative. This method has been validated in [2].

## SI2: Compliance

For each satellite species, the baseline level of PMD compliance is estimated using historical compliance data from 2000–2023, as reported in the ESA Space Debris Report [ESA2025ESASReport]. Since the dataset does not distinguish between satellite types, the counts for each category have been inferred based on whether a satellite forms part of a constellation and its mass. OPUS models all satellites that are naturally compliant as assumed to achieve PMD success with no failure. Figure S3 illustrates the annual compliance levels, divided into the four disposal outcome categories described previously.

Table S2 summarises the average compliance levels for each satellite species, calculated over two time periods: 2000–2023 and from 2010 onwards. The results indicate that compliance among non-naturally compliant satellites has improved in recent years; however, the proportion of satellites with no deorbit attempt remains high—58.5% for  $S$  and 37.7% for  $S_u$ . Providing a baseline average of 45% compliance for satellites with manoeuvring capability in non-naturally compliant orbits. If  $S_{ns}$  are included, this reduces to 40%.

Interestingly,  $S_u$  exhibits a higher proportion of successful direct disposals compared to  $S$ . As  $S_{ns}$  satellites are non-maneuvrable, they consistently show 100% in the no-deorbit-attempt category.

The OPUS model projects the evolution of PMD compliance over the next 25 years. Constellations continue to be deployed, improvements in propulsion technology and reductions in manoeuvre costs are expected to enable greater compliance among satellites operating in non-naturally compliant orbits, particularly for  $S$ -type satellites. Consequently,  $S$  satellites are assumed to achieve higher active disposal rates, with 90% completing a controlled direct disposal and the remaining 10% failing to deorbit. This reflects the expectation that uncontrolled disposals will become increasingly rare, as they carry the risk of a derelict satellite briefly re-entering the operational altitude band during early orbital decay. For example, OneWeb, which operates at approximately 1,200 km altitude, had launched 654 satellites as of October 2025, with only two failures recorded. As an increasing proportion of LEO traffic consists of satellites from large, professionally managed constellations, compliance is expected to improve further due to a combination of self-interested operational incentives and growing normative, political, and technical pressures to ensure responsible end-of-life behaviour.

For  $S_u$  satellites, representing smaller or individually operated spacecraft, compliance improvements are expected to be more limited. These satellites typically have fewer operational constraints and less coordination with other systems, which reduces the incentive for active disposal. Therefore, the proportion of successful direct disposals for a no bond scenario is assumed to remain at 65%, with around 35% undergoing uncontrolled re-entry.

Finally, for  $S_{ns}$  satellites, it is anticipated that manoeuvring capabilities will become increasingly common, even among small and CubeSat satellites, due to continued miniaturisation and cost reductions in propulsion technology. The proposed EU Commission Space Act has also argued for mandatory propulsion on all satellites that are operated in, or sell products to the European Union. In a policy context where an orbital bond or similar economic incentive is introduced, we assume that non-maneuvrable satellites are less likely to be deployed. As such,  $S_{ns}$  satellites are assigned the same baseline PMD configuration as  $S_u$ , but with a reduced bond value to reflect their lower mass and economic impact.

## SI3: Revenue Estimation

The amount of revenue a satellite generates for one year in orbit is extremely difficult to estimate. In principle, revenue could be estimated from public market-based data, but companies often only report total revenue rather than breaking it down per satellite. Moreover, many companies provide value-added products incorporating detail from multiple sources, again complicating the ability to connect revenue to particular satellites. These parameters can be estimated through other methods, including first-principles engineering models (e.g., [Guyot2024SustainableOrbit]) and empirical inference from observed historical launch behaviour [Rao2020Orbital-useIndustry].

Lacking ideal economic data, we have used the approach outlined by [Brownhall2025AAnalysis] by calibrating OPUS economic parameters against historical launch data. For simplicity, the inverse demand function representing willing-to-pay for satellite services from species  $i$  is assumed to be linear:

$$p_i(S_{ii}) = a_i + b_i * S_{ii} \tag{S11}$$

We treat the baseline demand curve intercepts  $a_i$  (one per satellite type  $i$ ) and slope coefficients ( $b_i$ ) as unknowns and optimise over them to match observed counts from 2017 to 2025. Intuitively, these represent (i) the maximum customers would pay annually for satellite services absent any competition, and (ii) the loss in revenue per satellite resulting from competition as other satellites accumulate.

Revenue is set exogenously by the optimiser and passed into the model; the elasticity is then set based on that revenue value and is also supplied exogenously. The elasticity is the percentage change in satellite service demand for species  $i$  for a 1%

change in price,  $p_i$ :

$$\varepsilon_{S_i p_i} \equiv \frac{dS_i}{S_i} \frac{p_i}{p_i} < 0, \quad (\text{S12})$$

where  $S_i$  is the total number of satellites. Intuitively, the elasticity captures the response of demand to changes in prices - if the price of satellite services increased by 30% overnight, how much demand for satellite services would there be? If  $|\varepsilon_{S_i p_i}| < 1$  demand is relatively inelastic (small change in  $S_i$  for a given change in  $p_i$ ); if  $|\varepsilon_{S_i p_i}| > 1$  it is relatively elastic (large change in  $S_i$ ). Assuming a linear inverse demand curve (Equation S11) the elasticity becomes

$$\varepsilon_{S_i p_i} = -\frac{a_i - b_i S_i}{b_i S_i}. \quad (\text{S13})$$

To our knowledge, no empirical elasticity estimates exist in the wider literature for satellite communications. As such, we follow [11], which finds the (terrestrial) telecommunications demand elasticity to be roughly  $-1$ , equating to a 1% increase in price will lead to a 1% decrease in quantity demanded. Imposing  $\varepsilon_{S_i p_i} = -1$  in (S13) gives:

$$-1 = -\frac{a_i - b_i S_i}{b_i S_i} \Rightarrow b_i = \frac{a_i}{2S_i}. \quad (\text{S14})$$

Let  $\mathcal{S} = \{S, S_u, S_{ns}\}$  be the set of satellite species with endogenous demand. Starting OPUS on 1<sup>st</sup> January 2017, we choose  $\mathbf{a} = \{a_i\}_{i \in \mathcal{S}}$  to match the observed (target) number of satellites  $N_i^{\text{target}}$ :

$$\min_{\mathbf{a}} \sum_{i \in \mathcal{S}} \left( N_i^{\text{OPUS}}(\mathbf{a}) - N_i^{\text{target}} \right)^2, \quad (\text{S15})$$

The Union of Concerned Scientists (UCS) Satellite Database [10] was used to determine the number of each LEO satellite species launched before 1st January, 2017. The database was first filtered for only ‘‘Commercial’’ users, to remove military and governmental satellites<sup>1</sup>, as these will follow different revenue models and OPUS is not designed to accommodate these types of satellite. CubeSats were differentiated by a dry mass less than 20kg. Constellations were determined using constellation names, including GlobalStar, Iridium and OrbComm. In 2025, the same process was applied. Space-Track.org information was used to augment the UCS database, which was last updated in 2023. In 2017 there were 21  $S$ , 22  $S_u$  and 2  $S_{ns}$  (see ).

OPUS was configured with the correct starting initial satellite population and their altitude. No non-tracked debris was included in the initial population. Altitudes of debris and rocket body species were populated from the Space Environment Pathway database [6, 7]. A run with an initial grid search of revenue was conducted to gain a rough initial estimates for the solver, then a least squares optimiser determined the best fitting estimates for  $a_i$ , with  $b_i$  then determined by Equation S14. The final intercept and slope coefficients for demand are presented in Table S3.

## S14: Species Level Effects of Bond

Figure S6 presents the same results as Figure 3 4 in the main text, disaggregated by species:  $S$  denotes constellation satellites,  $S_u$  non-constellation satellites, and  $S_{ns}$  CubeSats. For the larger satellites ( $S$  and  $S_u$ ), as the bond increases, the number of compliant derelicts rises under both the 5- and 25-year PMD rules, while the number of non-compliant derelicts falls. The reduction in non-compliance exhibits diminishing returns, with a clear plateau beyond a bond level of roughly \$1 million.

By contrast, the smallest class ( $S_{ns}$ ) shows a different pattern: at high bond levels, the total number of CubeSats launched declines. This reflects limited annual revenue in that segment, which becomes insufficient to cover operating costs once the bond is added. As launches fall, the number of compliant derelicts also declines mechanically because there are fewer active satellites reaching end-of-life.

## S15: PMD Compliance Curve

Figure S8 visualizes the equation used in this work to estimate PMD compliance as a function of the level of compliance effort (which is assumed to be proportional to bond amount). This curve is based on the judgment of the authors, informed by informal interviews with relevant subject matter experts. As a baseline with zero bond effort, the curve begins at 45% compliance, reflecting current observed values for satellites with manoeuvring capability in non-naturally compliant orbits. Interviewees indicated that 80-90% large constellation PMD compliance is achievable with modest effort. Accordingly, we

<sup>1</sup>In OPUS, operational satellites will avoid collision with any other active satellite, therefore there we assume collision risk between pairs of active satellites and can be removed from this simulation.

calibrate a 50 percent level of effort to approximately 87% compliance. Large constellation operators generally believe that PMD compliance of 95-97% is achievable. Accordingly, we model compliance as asymptotically approaching 97%, noting that additional compliance becomes increasingly expensive with diminishing returns for very high compliance rates. Precise values for 75 and 100 percent effort are chosen to produce a smooth curve, with 100 percent effort corresponding to a bond value equal to the critical bond level  $b_h^*$  from Equation 6 in the main text, producing approximately 95% compliance.

## Supplementary Figures

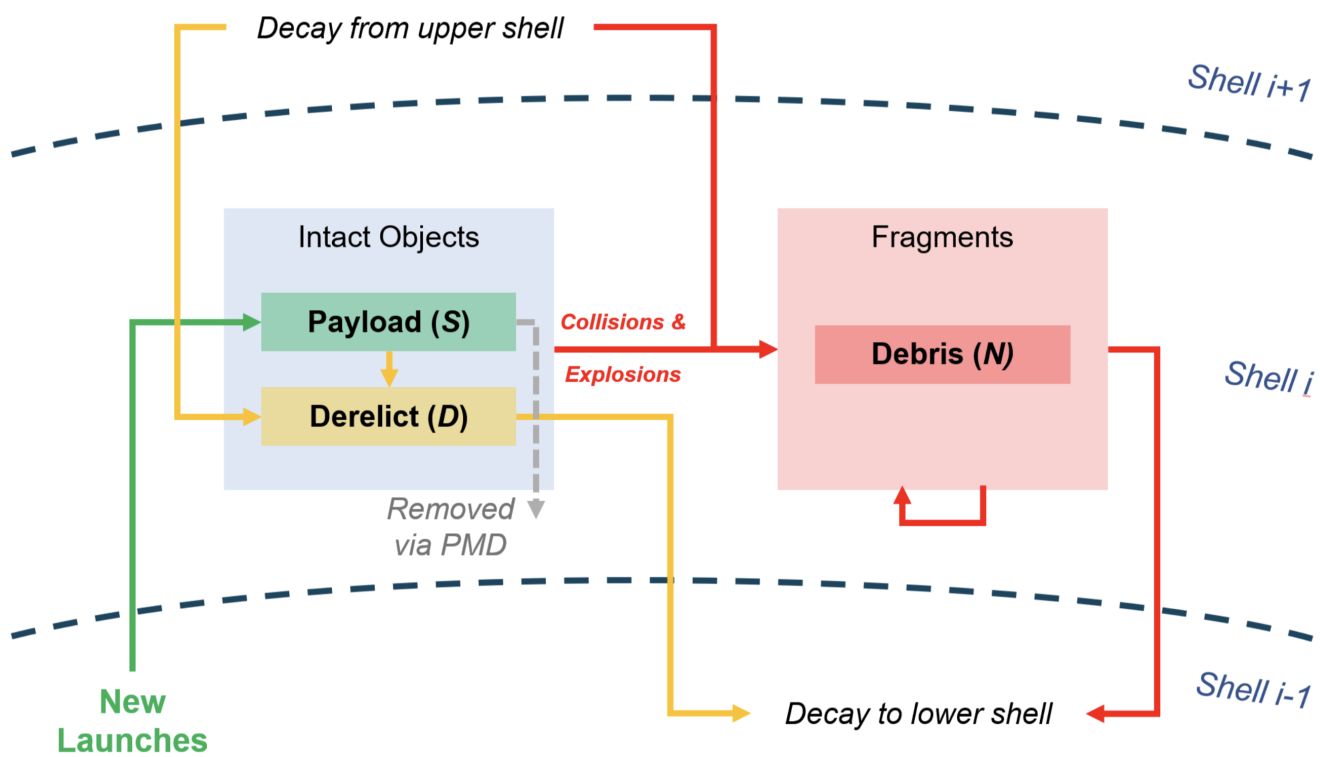

**Figure S1.** Qualitative schematics of the MOCAT-SSEM model

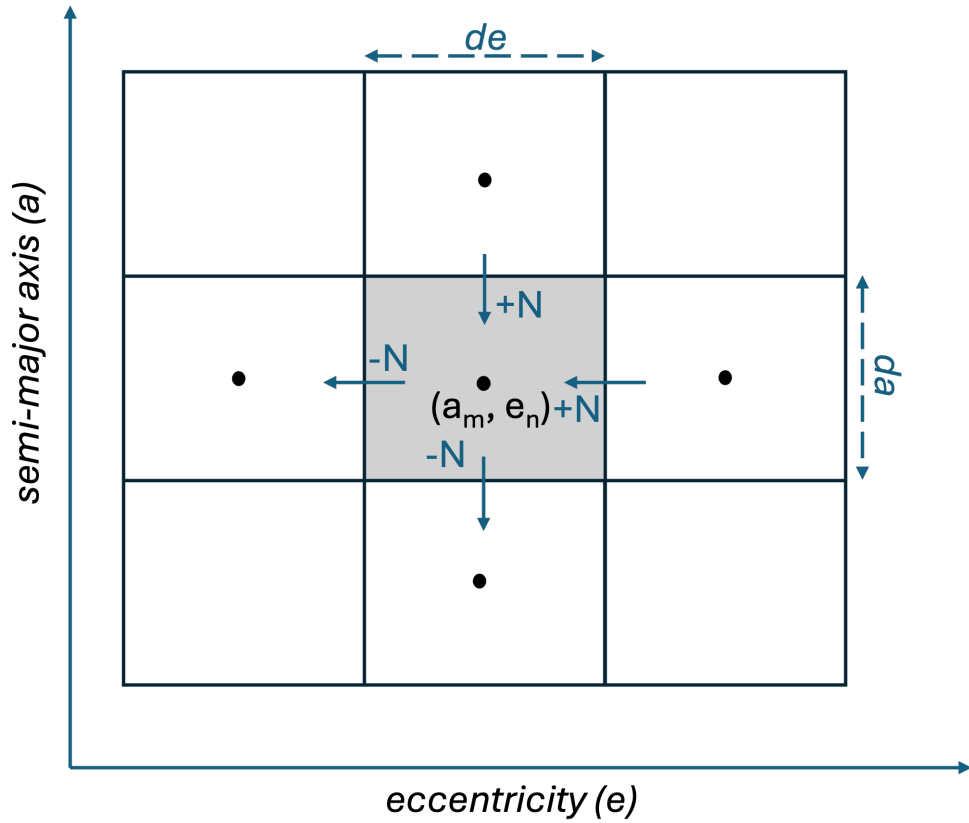

**Figure S2.** Flux model methodology for one point in semi-major axis and eccentricity space. The growth of the population at point  $a_m, e_n$  would be a function of the increase from boxes above to the right. And a decrease to the boxes to the left and below.

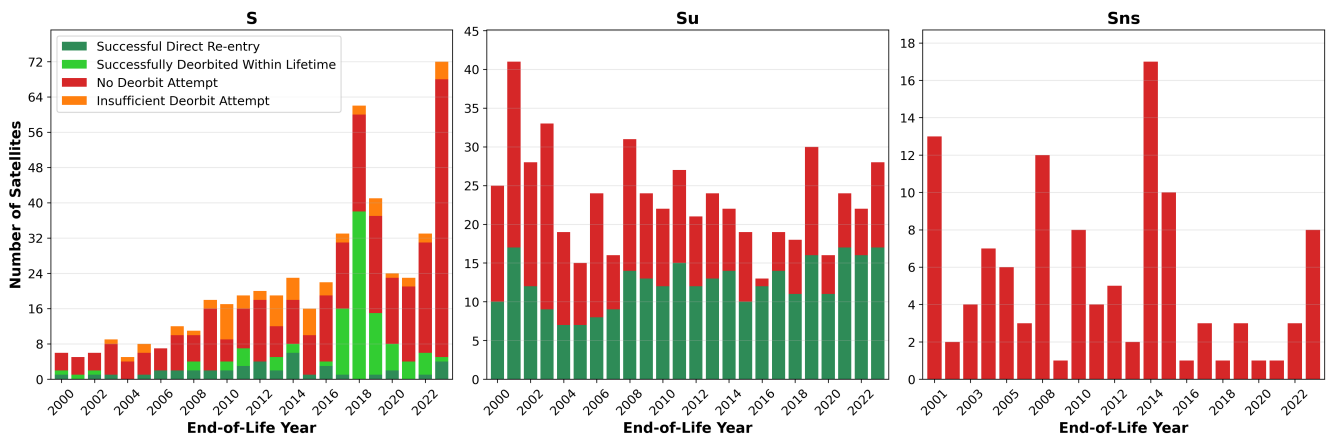

**Figure S3.** Non-Naturally Compliant Satellites (25 years lifetime) from 2000-2023 from the ESA Space Debris 2025 Report. Each satellite has been split into species. Data from [3]

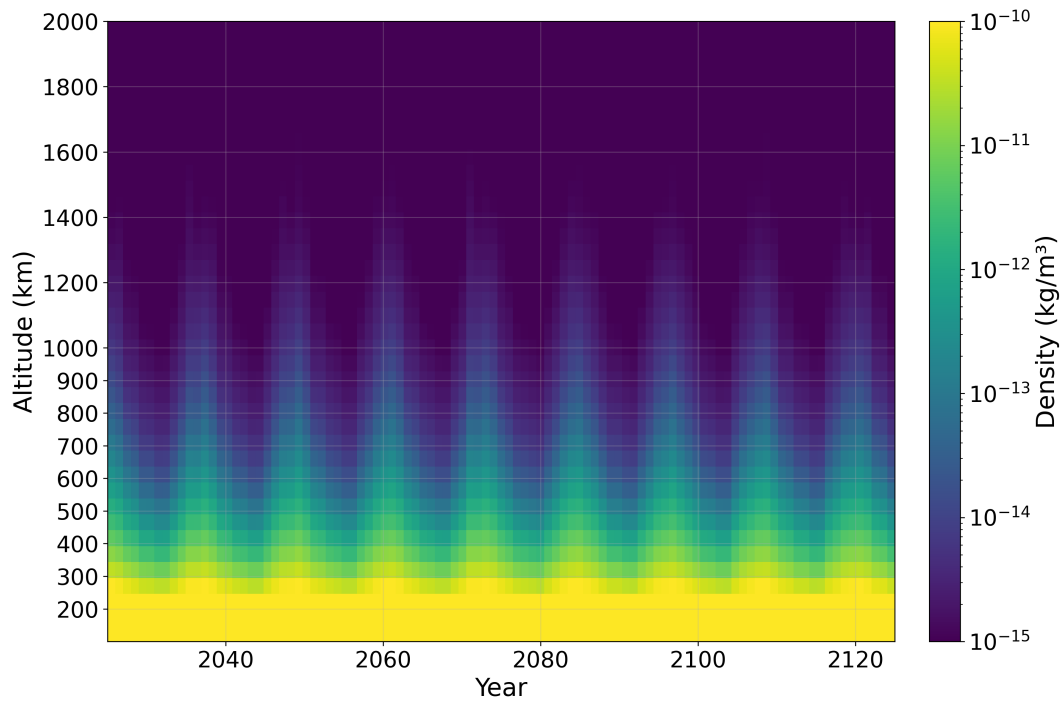

**Figure S4.** Atmospheric Density Values for JB2008 with a solar cycle estimation. Data is from [4]

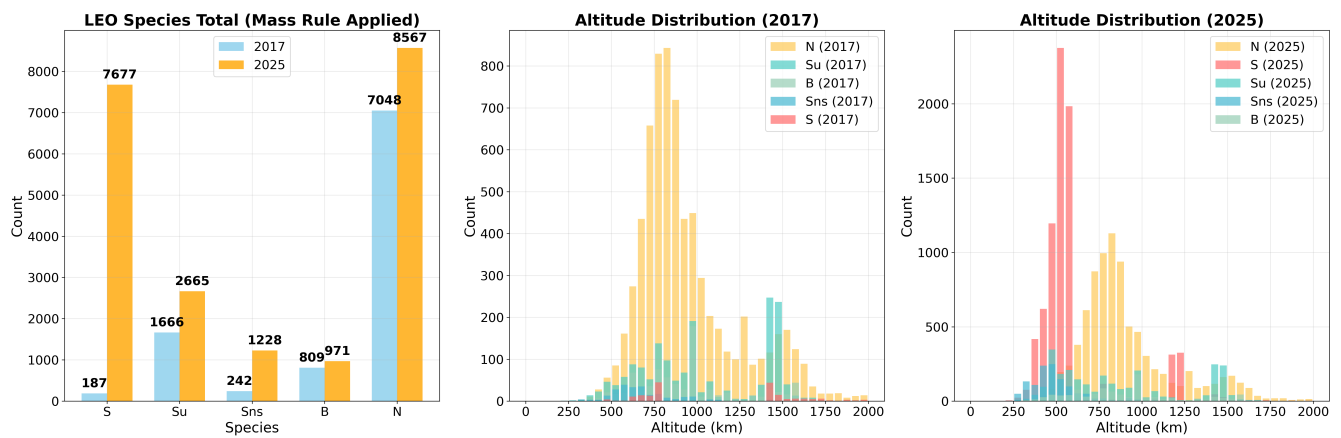

**Figure S5.** A comparison between 2017 and 2025 population dataset split into Species. Data source: Space-track.

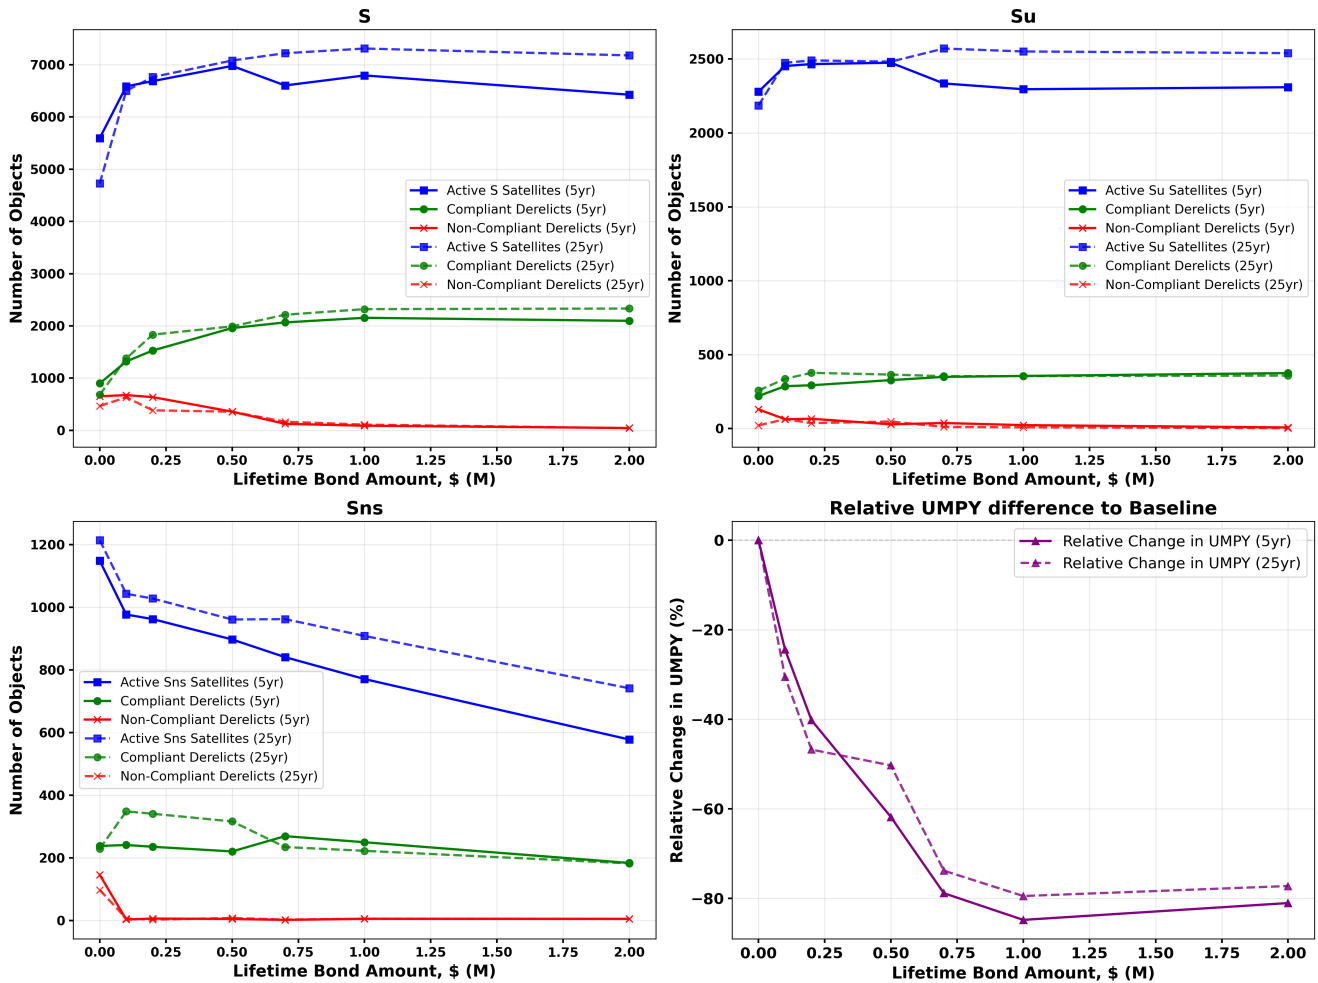

**Figure S6.** Final-year outcomes for each satellite species under increasing PMD bond values. Each of the three left-hand panels shows the final number of active satellites, compliant derelicts, and non-compliant derelicts for the  $S$ ,  $S_u$ , and  $S_{ns}$  species under both 5-year and 25-year disposal regimes. The bottom right plot presents the relative change in UMPY compared with the baseline (no-bond) scenario. As the bond level increases, non-compliant derelicts fall sharply across all species, while compliant derelicts initially rise and then stabilise.

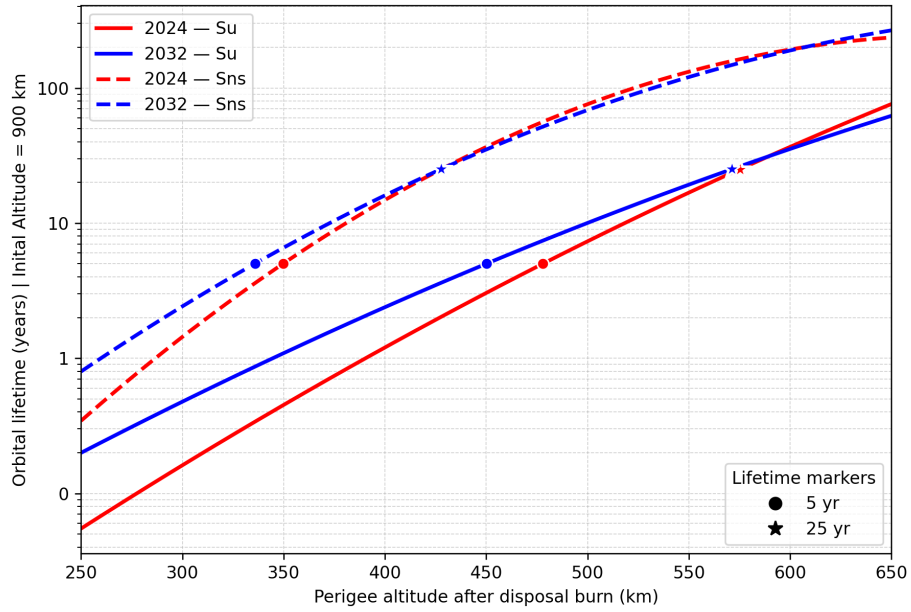

**Figure S7.** Orbital Lifetime of *Su* ( $0.013 \text{ m}^2/\text{kg}$ ) and *Sns* ( $0.0017 \text{ m}^2/\text{kg}$ ). Both assume a  $C_d = 2.2$ . For a starting circular orbit at an altitude of 900 km, for a starting disposal at either 2024 (near solar maximum) or 2032 (near solar minimum). The plot shows the orbital lifetime depending on the Perigee altitude of the orbit after an initial disposal burn. The required Perigee altitude for 5 and 20 year deorbit compliance is plotted.

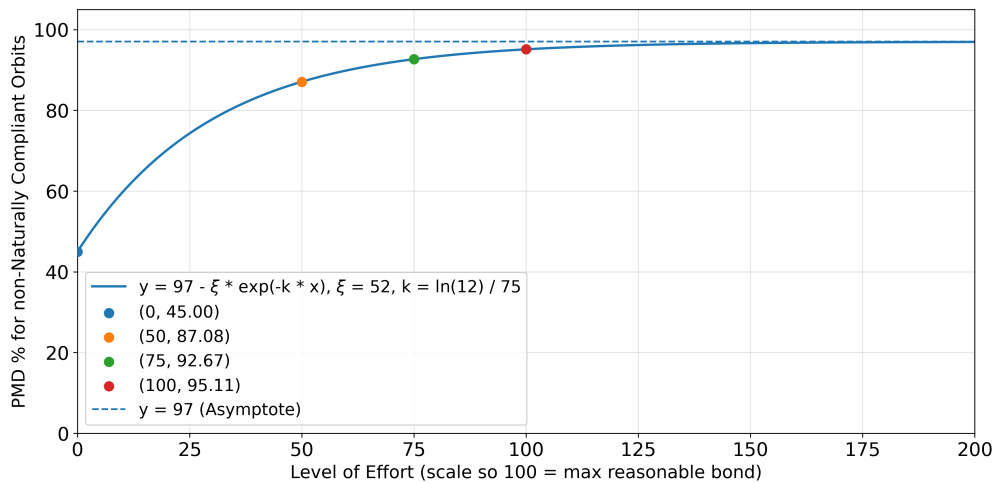

**Figure S8.** A comparison of the level of effort to deorbit a satellite to complete disposal and the corresponding achievable compliance rate given that effort level.

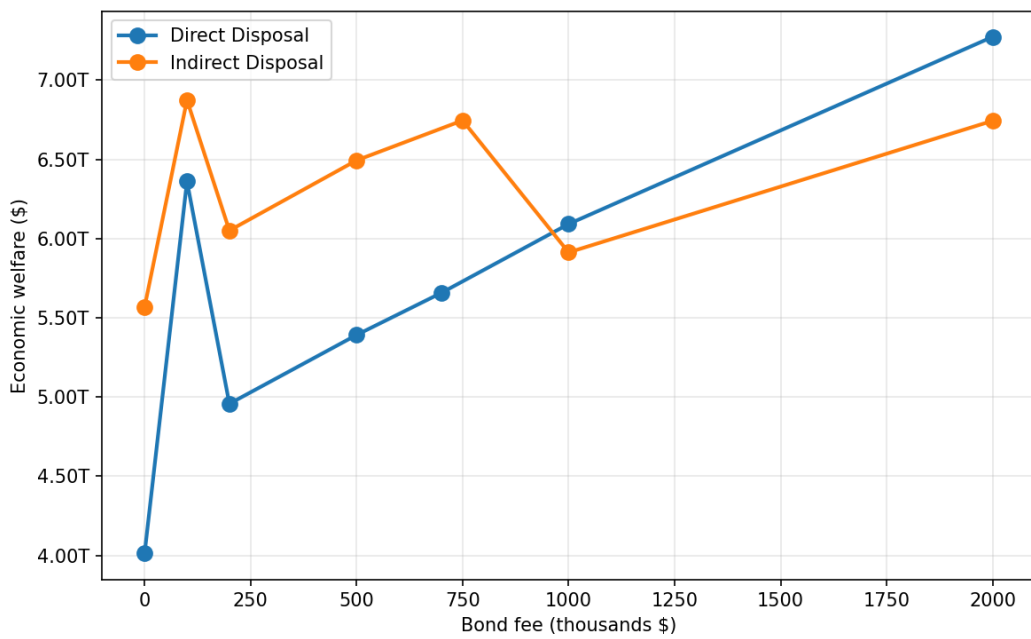

**Figure S9.** Economic welfare after 25 years under PMD bonds refunded upon indirect versus direct disposal. For each policy design, welfare is reported across a range of bond fees.

## Supplementary Tables

| MOCAT-SSEM Parameters    |                               |                       |                       |                       |                                |                       |
|--------------------------|-------------------------------|-----------------------|-----------------------|-----------------------|--------------------------------|-----------------------|
| Parameter                | Description                   | S                     | S <sub>u</sub>        | S <sub>ns</sub>       | N (Debris)                     | B (RB)                |
| Mass [kg]                | Mass of body                  | 521                   | 700                   | 20                    | {0.0369, 0.567, 3}             | 910                   |
| Radius [m]               | Mean radius                   | 2.5798                | 1.7186                | 0.1056                | {0.03, 0.1321, 0.5}            | 1.45                  |
| Area A [m <sup>2</sup> ] | Cross-sectional area          | 20.9080               | 9.2789                | 0.035                 | {0.0108, 0.035, 0.035}         | 6.6122                |
| Cd                       | Drag coefficient              | 2.2                   | 2.2                   | 2.2                   | 2.2                            | 2.2                   |
| Active                   | Acts as satellite             | true                  | true                  | true                  | false                          | false                 |
| Manoeuvrable             | Can avoid collisions          | true                  | true                  | true                  | false                          | false                 |
| Slotted                  | Uses slotting scheme          | true                  | false                 | false                 | false                          | false                 |
| Slotting effectiveness   | Efficacy of slotting          | 1                     | 0                     | 0                     | N/A                            | N/A                   |
| Drag_effected            | Atmospheric drag applied      | false                 | false                 | false                 | true                           | true                  |
| $\Delta t$ [yrs]         | Operational lifetime          | 5                     | 8                     | 5                     | N/A                            | N/A                   |
| $P_M$                    | Baseline PMD success          | 0.95                  | 0.65                  | 0.65                  | N/A                            | N/A                   |
| bstar                    | Drag ballistic term           | $8.81 \times 10^{-8}$ | $2.35 \times 10^{-8}$ | $1.28 \times 10^{-8}$ | {4.10e-07, 1.88e-08, 1.88e-08} | $1.60 \times 10^{-8}$ |
| RBflag                   | Rocket body indicator         | 0                     | 0                     | 0                     | 0                              | 1                     |
| OPUS Economic Parameters |                               |                       |                       |                       |                                |                       |
| Sat Lifetime [yrs]       | Lifetime in OPUS              | 5                     | 5                     | 5                     | –                              | –                     |
| Discount Rate            | Interest rate                 | 0.05                  | 0.05                  | 0.05                  | –                              | –                     |
| Revenue Intercept        | $\alpha_1$ (no competition)   | 1,665,764             | 2,205,401             | 55,701                | –                              | –                     |
| Revenue slope            | $\alpha_2$                    | 111.89                | 423.46                | 22.67                 | –                              | –                     |
| Lift price [\$/kg]       | Access-to-orbit cost          | 5000                  | 5000                  | 5000                  | –                              | –                     |
| Delta-v cost [\$/m/s]    | Propulsion cost               | 1000                  | 1000                  | 1000                  | –                              | –                     |
| Controlled PMD frac      | Fraction of direct re-entries | 0.6                   | 0                     | 0                     | –                              | –                     |
| Uncontrolled PMD frac    | Derelict decay PMD            | 0                     | 0.6                   | 0.6                   | –                              | –                     |
| No-attempt PMD frac      | Failed compliance             | 0.4                   | 0.4                   | 0.4                   | –                              | –                     |

**Table S1.** Full configuration parameters for all species used in MOCAT-SSEM and OPUS.

| Disposal Outcome               | S              |                | S <sub>u</sub> |                | S <sub>ns</sub> |               |
|--------------------------------|----------------|----------------|----------------|----------------|-----------------|---------------|
|                                | 2000–2024      | 2010–2024      | 2000–2024      | 2010–2024      | 2000–2024       | 2010–2024     |
| Successful Direct Re-entry (%) | 8.2 (42/511)   | 7.1 (30/424)   | 52.8 (296/561) | 62.3 (190/305) | 0.0 (0/115)     | 0.0 (0/67)    |
| Deorbited Within Lifetime (%)  | 19.6 (100/511) | 22.4 (95/424)  | 0.0 (0/561)    | 0.0 (0/305)    | 0.0 (0/115)     | 0.0 (0/67)    |
| No Deorbit Attempt (%)         | 60.5 (309/511) | 58.5 (248/424) | 47.2 (265/561) | 37.7 (115/305) | 100.0 (115/115) | 100.0 (67/67) |
| Insufficient Attempt (%)       | 11.7 (60/511)  | 12.0 (51/424)  | 0.0 (0/561)    | 0.0 (0/305)    | 0.0 (0/115)     | 0.0 (0/67)    |

**Table S2.** Observed post-mission disposal outcomes for each satellite species ( $S$ ,  $S_u$ , and  $S_{ns}$ ) across two time periods (2000–2024 and 2010–2024). Percentages represent the proportion of each outcome relative to the total number of satellites ( $n$ ).

| Species  | Intercept (\$) $a$ | Slope Coef. $b$ | Satellites as of 1st Jan 2025 |
|----------|--------------------|-----------------|-------------------------------|
| $S$      | 1,665,764          | 111.89          | 7,677                         |
| $S_u$    | 2,205,401          | 423.46          | 2,665                         |
| $S_{ns}$ | 55,701             | 22.67           | 1,228                         |

**Table S3.** Final calibrated revenue intercepts ( $R_i$ ) and corresponding simulated satellite populations ( $N_i$ ) using Jacobian least-squares.

| <b>Bond Amount (\$M)</b> | <b>Revenue 5-year (\$B)</b> | <b>Revenue 25-year (\$B)</b> |
|--------------------------|-----------------------------|------------------------------|
| \$0                      | 0.00                        | 0.00                         |
| \$100k                   | 1.45                        | 1.47                         |
| \$200k                   | 2.49                        | 2.06                         |
| \$500k                   | 2.75                        | 3.05                         |
| \$700k                   | 2.39                        | 2.56                         |
| \$1.0M                   | 1.98                        | 2.23                         |
| \$2.0M                   | 1.87                        | 1.91                         |

**Table S4.** Cumulative revenue (in billions) from non-compliant derelict fees for 5-year and 25-year PMD disposal rules

## References

- [1] Bruce Bowman et al. “A New Empirical Thermospheric Density Model JB2008 Using New Solar and Geomagnetic Indices”. In: *AIAA/AAS Astrodynamics Specialist Conference and Exhibit*. Reston, Virginia: American Institute of Aeronautics and Astronautics, Aug. 2008. DOI: [10.2514/6.2008-6438](https://doi.org/10.2514/6.2008-6438).
- [2] Indigo Brownhall et al. “A Flexible and Improved Source Sink Evolutionary Model to Support Transdisciplinary Orbital Capacity Analysis”. In: *AAS/AIAA Astrodynamics Specialist Conference*. Boston, 2025.
- [3] European Space Agency. *ESA’S 2025 Annual Space Environment Report*. Tech. rep. 1. European Space Agency, 2025. URL: [https://www.sdo.esoc.esa.int/environment\\_report/Space\\_Environment\\_Report\\_latest.pdf](https://www.sdo.esoc.esa.int/environment_report/Space_Environment_Report_latest.pdf) (visited on 10/21/2025).
- [4] Daniel Jang et al. “New Monte Carlo Model for the Space Environment”. In: *Journal of Spacecraft and Rockets* (Mar. 2025), pp. 1–22. DOI: [10.2514/1.A36137](https://doi.org/10.2514/1.A36137).
- [5] N. L. Johnson et al. “NASA’s new breakup model of EVOLVE 4.0”. In: *Advances in Space Research* 28.9 (2001), pp. 1377–1384. DOI: [10.1016/S0273-1177\(01\)00423-9](https://doi.org/10.1016/S0273-1177(01)00423-9).
- [6] Miles Lifson, Daniel Jang, and Richard Linares. “Space Environmental Governance and Decision Support using Source-Sink Evolutionary Environmental Models”. In: *Advanced Maui Optical and Space Surveillance Technologies (AMOS) Conference*. Maui, 2023.
- [7] Miles Lifson et al. “Development of Reference Scenarios and Supporting Inputs for Space Environment Modeling”. In: *Advanced Maui Optical and Space Surveillance Technologies (AMOS) Conference*. Maui, HI: Maui Economic Development Board, Sept. 2024.
- [8] Miles Lifson et al. “MOCAT-SSEM A Source-Sink Evolutionary Model for Space Debris Environment Evolutionary Modeling”. In: *9th Annual Space Traffic Management Conference*. Austin, TX: IAA, 2023.
- [9] Vladimir Martinusi, Lamberto Dell’Elce, and Gaëtan Kerschen. “Analytic propagation of near-circular satellite orbits in the atmosphere of an oblate planet”. In: *Celestial Mechanics and Dynamical Astronomy* 123.1 (Sept. 2015), pp. 85–103. DOI: [10.1007/s10569-015-9630-7](https://doi.org/10.1007/s10569-015-9630-7).
- [10] UCS. *Satellite Database | Union of Concerned Scientists (UCS)*. 2023. URL: <https://www.ucs.org/resources/satellite-database>.
- [11] Frank A. Wolak. “The Welfare Impacts of Competitive Telecommunications Supply: A Household-Level Analysis”. In: *Brookings Papers on Economic Activity: Microeconomics* (1996), pp. 269–340. URL: [https://www.brookings.edu/wp-content/uploads/1996/01/1996\\_bpeamicro\\_wolak.pdf](https://www.brookings.edu/wp-content/uploads/1996/01/1996_bpeamicro_wolak.pdf) (visited on 02/03/2026).
